# Supplementary material for: Galectin-3 not Galectin-9 as a candidate prognosis marker for hepatocellular carcinoma
Source: PeerJ journal article supplement (doi:10.7717/peerj.9949), 2020-09-16
Supplement: Supplementary_Figure.pdf [file Supplementary_Figure.pdf]

**Supplementary figure: Negative and positive control of Galectin-3 and Galectin-9 (SP, ×200).**

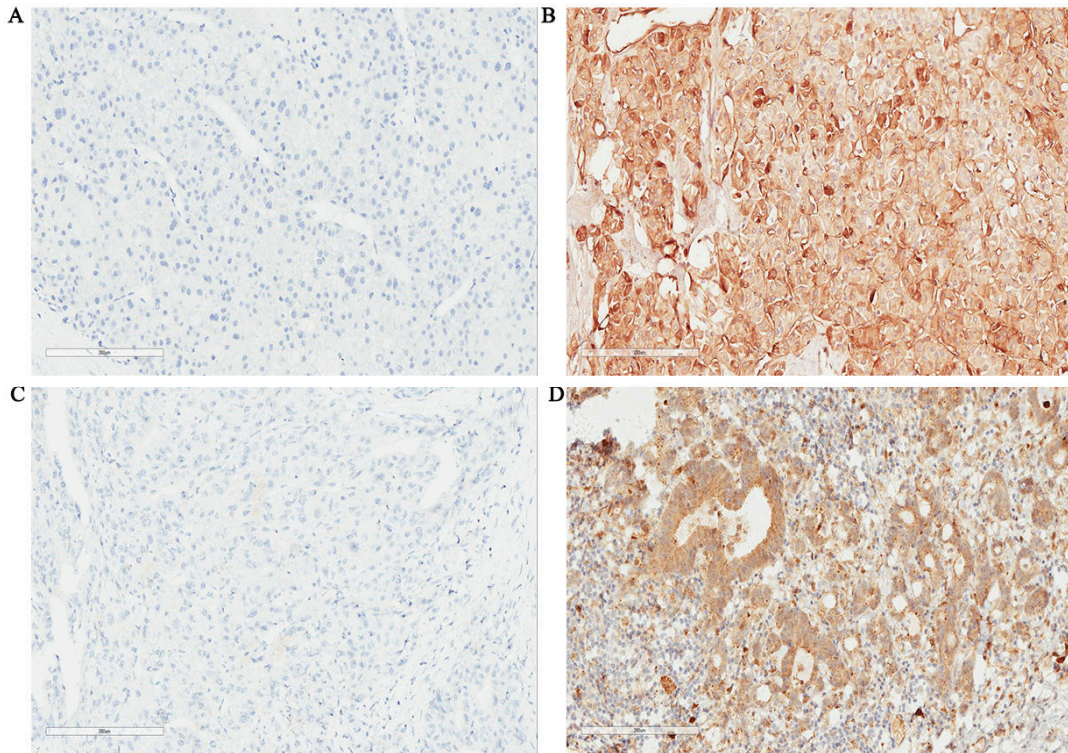

(A) Negative expression of Galectin-3 in tumor cells of HCC; (B) Positive expression of Galectin-3 in tumor cells of thyroid papillary cancer; (C) Negative expression of Galectin-9 in tumor cells of HCC; (D) Positive expression of Galectin-9 in tumor cells of gastric cancer;
