# Supplementary material for: Galectin-3 not Galectin-9 as a candidate prognosis marker for hepatocellular carcinoma
Source: PeerJ journal article supplement (doi:10.7717/peerj.9949), 2020-09-16
Supplement: Suppltmental_Table.pdf [file Suppltmental_Table.pdf]

| No.     | sex | age | HBV      | HCV      | Differentiation | number of tumor | Tumor Size | Lymph-vascular invasion | AJCC | Cirrhosis | Gal-3 | Gal-9 | Survival time | endpoints |
|---------|-----|-----|----------|----------|-----------------|-----------------|------------|-------------------------|------|-----------|-------|-------|---------------|-----------|
| 279,269 | 1   | 69  | negative | positive | moderate        | single          | 4.0        | no                      | I    | Yes       | 0     | 90    | 44.0          | death     |
| 281,455 | 1   | 67  | positive | negative | moderate        | single          | 6.0        | no                      | I    | No        | 0     | 0     | 127.8         | survival  |
| 288,531 | 1   | 63  | negative | positive | moderate        | single          | 7.0        | no                      | I    | Yes       | 270   | 180   | 7.3           | death     |
| 289,183 | 2   | 60  | positive | negative | poor            | single          | 5.0        | no                      | II   | Yes       | 0     | 180   | 124.2         | survival  |
| 289,890 | 1   | 60  | positive | negative | well            | single          | 3.5        | no                      | I    | Yes       | 210   | 90    | 123.9         | survival  |
| 290,074 | 1   | 46  | positive | negative | well            | single          | 6.0        | Yes                     | II   | Yes       | 0     | 180   | 123.9         | survival  |
| 290,474 | 1   | 55  | negative | negative | well            | single          | 6.0        | no                      | I    | No        | 0     | 270   | 123.9         | survival  |
| 291,973 | 1   | 63  | positive | negative | well            | single          | 4.5        | no                      | I    | Yes       | 0     | 90    | 123.2         | survival  |
| 292,429 | 2   | 61  | positive | negative | well            | single          | 3.4        | no                      | I    | Yes       | 0     | 90    | 123.2         | survival  |
| 292,802 | 1   | 53  | negative | positive | well            | single          | 2.7        | no                      | I    | Yes       | 0     | 180   | 46.1          | death     |
| 292,961 | 1   | 46  | positive | negative | moderate        | single          | 5.5        | no                      | I    | Yes       | 0     | 0     | 8.2           | death     |
| 293,346 | 2   | 58  | negative | positive | well            | single          | 3.5        | no                      | I    | No        | 0     | 180   | 122.7         | survival  |
| 294,775 | 1   | 34  | positive | negative | moderate        | single          | 1.0        | no                      | II   | Yes       | 0     | 0     | 122.2         | survival  |
| 295,048 | 1   | 27  | positive | negative | poor            | multiple        | 7.0        | Yes                     | III  | No        | 15    | 80    | 3.8           | death     |
| 295,954 | 2   | 60  | positive | negative | poor            | single          | 4.0        | Yes                     | II   | No        | 240   | 180   | 5.6           | death     |
| 296,313 | 1   | 53  | positive | negative | moderate        | single          | 8.0        | Yes                     | II   | No        | 270   | 180   | 27.7          | death     |
| 296,991 | 1   | 44  | positive | negative | moderate        | single          | 2.0        | no                      | I    | Yes       | 0     | 60    | 14.9          | death     |
| 297,396 | 1   | 71  | negative | positive | moderate        | multiple        | 7.0        | Yes                     | III  | Yes       | 30    | 0     | 121.1         | survival  |
| 297,621 | 1   | 61  | negative | negative | poor            | single          | 7.0        | Yes                     | II   | Yes       | 20    | 0     | 95.3          | death     |
| 297,979 | 1   | 60  | positive | negative | well            | single          | 4.0        | no                      | I    | Yes       | 80    | 90    | 121.2         | survival  |
| 298,248 | 2   | 56  | positive | negative | moderate        | multiple        | 2.7        | Yes                     | II   | Yes       | 20    | 180   | 61.2          | death     |
| 298,430 | 1   | 55  | positive | negative | moderate        | single          | 2.0        | no                      | II   | Yes       | 80    | 180   | 30.7          | death     |
| 298,650 | 1   | 50  | positive | negative | moderate        | single          | 4.5        | no                      | I    | Yes       | 0     | 180   | 24.9          | death     |
| 298,671 | 1   | 71  | positive | negative | well            | single          | 6.5        | no                      | I    | No        | 270   | 0     | 51.8          | death     |
| 300,144 | 1   | 58  | negative | negative | moderate        | single          | 5.0        | no                      | I    | No        | 60    | 270   | 73.1          | death     |
| 301,333 | 1   | 46  | negative | negative | moderate        | single          | 8.0        | no                      | I    | Yes       | 0     | 0     | 120.0         | survival  |
| 301,734 | 2   | 54  | positive | negative | poor            | single          | 6.5        | no                      | I    | Yes       | 0     | 180   | 4.6           | death     |
| 302,873 | 2   | 41  | positive | negative | poor            | single          | 2.0        | no                      | I    | Yes       | 0     | 0     | 82.7          | survival  |
| 303,670 | 1   | 62  | positive | negative | poor            | single          | 13.5       | Yes                     | II   | Yes       | 0     | 80    | 119.1         | survival  |
| 304,284 | 1   | 59  | negative | positive | moderate        | single          | 9.0        | no                      | I    | Yes       | 120   | 90    | 75.1          | death     |
| 306,391 | 1   | 64  | positive | negative | poor            | multiple        | 3.5        | no                      | I    | Yes       | 40    | 160   | 17.7          | death     |
| 307,110 | 1   | 44  | positive | negative | well            | single          | 6.5        | no                      | I    | Yes       | 10    | 70    | 117.8         | survival  |
| 309,771 | 1   | 57  | positive | negative | well            | single          | 2.5        | no                      | I    | Yes       | 0     | 180   | 38.0          | death     |
| 309,818 | 1   | 57  | positive | negative | poor            | multiple        | 8.0        | Yes                     | II   | Yes       | 0     | 0     | 116.4         | survival  |
| 310,384 | 1   | 72  | negative | positive | moderate        | single          | 5.0        | Yes                     | II   | Yes       | 210   | 90    | 49.9          | death     |
| 310,634 | 2   | 49  | positive | negative | poor            | multiple        | 4.5        | Yes                     | II   | Yes       | 90    | 270   | 116.3         | survival  |
| 310,977 | 1   | 55  | positive | negative | poor            | single          | 3.5        | Yes                     | II   | Yes       | 180   | 0     | 116.0         | survival  |
| 311,748 | 1   | 60  | positive | negative | well            | single          | 6.0        | Yes                     | II   | No        | 0     | 270   | 16.8          | death     |
| 311,749 | 1   | 47  | positive | negative | moderate        | single          | 2.5        | no                      | I    | Yes       | 0     | 140   | 115.7         | survival  |
| 311,784 | 1   | 62  | positive | negative | moderate        | multiple        | 11.5       | Yes                     | III  | No        | 0     | 60    | 7.7           | death     |

|         |   |    |          |          |          |          |      |     |     |     |     |     |       |                   |
|---------|---|----|----------|----------|----------|----------|------|-----|-----|-----|-----|-----|-------|-------------------|
| 312,622 | 1 | 52 | positive | positive | poor     | multiple | 5.0  | Yes | III | No  | 0   | 0   | 115.4 | survival          |
| 314,019 | 1 | 40 | positive | negative | well     | single   | 3.0  | Yes | II  | Yes | 0   | 180 | 12.9  | death             |
| 314,333 | 1 | 55 | positive | negative | moderate | multiple | 3.5  | Yes | II  | No  | 120 | 70  | 11.2  | lose to follow up |
| 314,513 | 2 | 64 | positive | negative | poor     | single   | 6.5  | Yes | II  | No  | 150 | 0   | 114.6 | survival          |
| 314,523 | 2 | 56 | positive | negative | moderate | single   | 1.0  | Yes | II  | Yes | 90  | 0   | 112.1 | death             |
| 314,637 | 2 | 37 | positive | negative | moderate | single   | 2.5  | no  | I   | Yes | 60  | 180 | 114.5 | survival          |
| 315,125 | 1 | 46 | negative | positive | poor     | multiple | 6.0  | Yes | III | Yes | 0   | 90  | 59.8  | death             |
| 315,329 | 1 | 47 | positive | negative | well     | single   | 2.5  | no  | I   | Yes | 0   | 180 | 114.5 | survival          |
| 315,717 | 1 | 55 | positive | negative | moderate | single   | 5.0  | no  | I   | Yes | 240 | 90  | 24.4  | death             |
| 315,805 | 2 | 44 | negative | positive | moderate | single   | 8.0  | Yes | II  | Yes | 0   | 90  | 101.5 | death             |
| 315,843 | 2 | 69 | negative | positive | moderate | single   | 1.3  | no  | I   | Yes | 0   | 0   | 114.0 | survival          |
| 315,857 | 1 | 61 | negative | positive | moderate | single   | 7.0  | no  | III | Yes | 0   | 180 | 26.6  | death             |
| 316,109 | 1 | 45 | positive | negative | moderate | single   | 4.5  | no  | I   | Yes | 150 | 90  | 112.4 | death             |
| 316,490 | 2 | 49 | positive | negative | poor     | single   | 5.0  | Yes | II  | Yes | 0   | 180 | 114.0 | survival          |
| 317,211 | 2 | 56 | positive | negative | moderate | multiple | 14.0 | Yes | III | Yes | 90  | 120 | 3.8   | death             |
| 317,646 | 1 | 59 | positive | negative | moderate | multiple | 8.0  | no  | III | Yes | 180 | 0   | 30.6  | death             |
| 317,710 | 2 | 60 | negative | negative | poor     | single   | 5.5  | no  | I   | Yes | 60  | 0   | 62.6  | death             |
| 317,981 | 1 | 61 | positive | negative | moderate | single   | 8.0  | Yes | II  | No  | 0   | 90  | 113.2 | survival          |
| 318,277 | 2 | 70 | negative | negative | well     | single   | 4.5  | no  | I   | Yes | 0   | 180 | 77.2  | death             |
| 318,365 | 1 | 38 | positive | negative | poor     | multiple | 5.0  | no  | II  | Yes | 0   | 0   | 60.0  | death             |
| 318,795 | 1 | 35 | positive | negative | poor     | single   | 6.0  | Yes | II  | Yes | 0   | 90  | 5.7   | death             |
| 318,929 | 1 | 56 | positive | negative | moderate | single   | 6.5  | no  | I   | No  | 0   | 70  | 113.1 | survival          |
| 319,124 | 1 | 51 | positive | negative | moderate | single   | 6.5  | no  | II  | No  | 0   | 60  | 112.8 | survival          |
| 319,329 | 1 | 46 | positive | negative | poor     | single   | 14.0 | Yes | II  | No  | 210 | 180 | 11.4  | death             |
| 319,883 | 1 | 60 | positive | negative | moderate | single   | 3.0  | no  | I   | Yes | 0   | 180 | 112.2 | survival          |
| 319,916 | 1 | 65 | negative | positive | poor     | single   | 12.0 | Yes | II  | Yes | 0   | 0   | 3.4   | death             |
| 320,265 | 1 | 59 | negative | positive | moderate | single   | 2.0  | Yes | II  | Yes | 0   | 210 | 48.0  | death             |
| 320,988 | 1 | 69 | negative | positive | moderate | single   | 4.5  | no  | I   | No  | 0   | 60  | 45.6  | death             |
| 321,339 | 1 | 33 | positive | negative | poor     | single   | 21.0 | Yes | III | Yes | 0   | 0   | 7.3   | death             |
| 322,047 | 1 | 51 | positive | negative | poor     | single   | 8.5  | Yes | II  | Yes | 0   | 30  | 17.3  | death             |
| 322,286 | 1 | 47 | positive | negative | poor     | multiple | 2.6  | Yes | II  | No  | 210 | 180 | 12.5  | death             |
| 323,136 | 1 | 39 | positive | negative | poor     | single   | 12.0 | Yes | III | No  | 0   | 80  | 111.2 | survival          |
| 323,500 | 1 | 54 | positive | negative | moderate | single   | 8.5  | no  | I   | Yes | 0   | 180 | 29.5  | death             |
| 324,028 | 1 | 69 | positive | negative | moderate | multiple | 11.0 | no  | III | Yes | 0   | 0   | 12.0  | death             |
| 324,692 | 1 | 58 | negative | negative | well     | single   | 3.0  | no  | I   | Yes | 0   | 0   | 110.7 | survival          |
| 324,967 | 1 | 54 | positive | negative | well     | single   | 2.5  | no  | II  | Yes | 0   | 270 | 41.4  | death             |
| 325,111 | 1 | 66 | negative | negative | well     | single   | 8.0  | no  | I   | No  | 160 | 90  | 71.6  | death             |
| 325,825 | 1 | 55 | positive | negative | moderate | multiple | 4.0  | no  | II  | No  | 210 | 90  | 34.8  | death             |
| 326,399 | 1 | 48 | positive | negative | moderate | multiple | 7.0  | Yes | III | No  | 0   | 80  | 8.3   | death             |
| 327,133 | 1 | 44 | positive | negative | moderate | multiple | 3.5  | Yes | II  | No  | 0   | 0   | 3.4   | death             |
| 327,769 | 1 | 66 | positive | negative | moderate | multiple | 11.0 | Yes | III | No  | 0   | 180 | 9.1   | death             |

|         |   |    |          |          |          |          |      |     |     |     |     |     |       |          |
|---------|---|----|----------|----------|----------|----------|------|-----|-----|-----|-----|-----|-------|----------|
| 328,575 | 1 | 60 | positive | negative | poor     | multiple | 8.0  | no  | III | No  | 270 | 270 | 10.1  | death    |
| 328,755 | 2 | 44 | positive | negative | moderate | single   | 5.5  | Yes | II  | No  | 240 | 0   | 6.8   | death    |
| 329,608 | 2 | 52 | positive | negative | well     | single   | 3.5  | no  | I   | No  | 100 | 90  | 109.0 | survival |
| 330,498 | 1 | 41 | positive | negative | moderate | single   | 2.5  | Yes | II  | No  | 0   | 70  | 108.7 | survival |
| 331,583 | 1 | 61 | negative | positive | moderate | single   | 3.5  | no  | I   | Yes | 0   | 180 | 108.3 | survival |
| 331,934 | 1 | 66 | negative | positive | poor     | single   | 5.0  | Yes | II  | No  | 100 | 180 | 108.2 | survival |
| 333,329 | 1 | 49 | positive | negative | poor     | multiple | 12.0 | no  | III | Yes | 0   | 270 | 5.3   | death    |
| 335,610 | 1 | 54 | positive | negative | well     | single   | 12.0 | no  | I   | No  | 0   | 90  | 43.7  | death    |
| 335,713 | 1 | 51 | positive | negative | moderate | multiple | 6.0  | Yes | III | No  | 0   | 270 | 16.3  | death    |
| 339,666 | 2 | 47 | positive | negative | moderate | single   | 5.0  | Yes | II  | Yes | 270 | 90  | 105.7 | survival |
| 340,364 | 1 | 56 | negative | negative | poor     | multiple | 7.5  | Yes | III | No  | 30  | 40  | 9.7   | death    |
| 340,819 | 1 | 48 | positive | negative | moderate | single   | 5.0  | no  | I   | No  | 150 | 270 | 105.4 | survival |
| 341,187 | 1 | 56 | negative | negative | well     | single   | 6.0  | no  | I   | No  | 0   | 270 | 49.5  | death    |
| 343,633 | 1 | 55 | negative | positive | moderate | single   | 4.6  | Yes | II  | Yes | 0   | 0   | 11.5  | death    |
| 344,657 | 1 | 53 | negative | negative | moderate | multiple | 8.5  | Yes | III | No  | 180 | 0   | 11.5  | death    |
| 344,950 | 1 | 41 | positive | negative | poor     | single   | 2.3  | no  | I   | Yes | 270 | 90  | 103.8 | survival |
| 345,936 | 1 | 57 | positive | negative | poor     | single   | 7.0  | no  | I   | Yes | 180 | 270 | 103.4 | survival |
| 346,079 | 1 | 38 | positive | negative | moderate | single   | 10.5 | Yes | II  | Yes | 0   | 240 | 35.9  | death    |
| 346,616 | 1 | 38 | negative | negative | well     | single   | 4.7  | no  | I   | No  | 80  | 90  | 69.3  | death    |
| 347,562 | 1 | 40 | negative | negative | moderate | single   | 2.5  | Yes | II  | No  | 270 | 0   | 30.1  | death    |
| 348,523 | 2 | 38 | negative | negative | moderate | multiple | 6.0  | no  | III | No  | 0   | 90  | 102.7 | survival |
| 349,137 | 1 | 62 | negative | negative | well     | single   | 9.0  | Yes | II  | No  | 0   | 50  | 102.4 | survival |
| 349,251 | 2 | 66 | negative | positive | well     | single   | 6.0  | no  | I   | No  | 140 | 180 | 90.8  | death    |
| 350,394 | 1 | 48 | positive | negative | well     | single   | 6.0  | no  | I   | No  | 30  | 0   | 102.2 | survival |
| 351,689 | 1 | 45 | positive | negative | moderate | multiple | 3.0  | no  | II  | No  | 270 | 270 | 25.1  | death    |
| 352,463 | 1 | 55 | positive | negative | poor     | single   | 3.0  | Yes | II  | Yes | 0   | 90  | 15.6  | death    |
| 352,708 | 1 | 53 | positive | negative | moderate | single   | 8.0  | Yes | II  | No  | 210 | 50  | 22.8  | death    |
| 353,066 | 1 | 54 | negative | positive | well     | single   | 4.0  | no  | I   | No  | 0   | 90  | 101.3 | survival |
| 353,404 | 1 | 61 | positive | negative | moderate | multiple | 10.0 | Yes | III | Yes | 0   | 90  | 5.2   | death    |
| 353,556 | 1 | 43 | positive | negative | moderate | single   | 4.5  | Yes | II  | No  | 0   | 0   | 100.8 | survival |
| 353,604 | 1 | 72 | positive | negative | moderate | multiple | 8.0  | Yes | III | No  | 20  | 180 | 15.1  | death    |
| 355,744 | 1 | 58 | positive | positive | moderate | single   | 3.0  | no  | I   | Yes | 60  | 180 | 93.6  | survival |
| 356,155 | 1 | 75 | negative | negative | moderate | single   | 5.0  | no  | I   | No  | 0   | 0   | 100.1 | survival |
| 356,871 | 1 | 45 | positive | negative | moderate | multiple | 9.0  | Yes | III | Yes | 0   | 270 | 9.0   | death    |
| 357,134 | 1 | 39 | positive | negative | well     | single   | 14.0 | Yes | III | No  | 210 | 180 | 7.3   | death    |
| 357,236 | 1 | 61 | positive | negative | well     | multiple | 2.5  | no  | II  | Yes | 180 | 80  | 45.4  | death    |
| 357,466 | 1 | 74 | negative | positive | poor     | single   | 2.0  | Yes | II  | Yes | 0   | 40  | 39.3  | death    |
| 358,610 | 1 | 58 | positive | negative | poor     | single   | 1.6  | no  | I   | Yes | 0   | 0   | 53.0  | death    |
| 358,718 | 1 | 48 | negative | negative | poor     | single   | 3.5  | Yes | II  | No  | 0   | 90  | 99.2  | survival |
| 359,177 | 1 | 56 | negative | negative | well     | multiple | 4.5  | no  | II  | No  | 0   | 90  | 37.5  | death    |
| 360,445 | 2 | 50 | positive | negative | moderate | multiple | 5.8  | Yes | III | Yes | 15  | 0   | 98.7  | survival |

|         |   |    |          |          |          |          |      |     |     |     |     |     |      |          |
|---------|---|----|----------|----------|----------|----------|------|-----|-----|-----|-----|-----|------|----------|
| 361,028 | 1 | 40 | positive | negative | poor     | single   | 6.5  | Yes | II  | Yes | 0   | 0   | 12.8 | death    |
| 362,342 | 1 | 49 | positive | negative | moderate | multiple | 3.5  | no  | II  | No  | 270 | 90  | 98.4 | survival |
| 362,873 | 2 | 57 | positive | negative | poor     | multiple | 5.5  | Yes | III | Yes | 0   | 0   | 4.3  | death    |
| 362,976 | 2 | 69 | negative | positive | well     | single   | 5.5  | no  | I   | Yes | 0   | 90  | 17.5 | death    |
| 363,167 | 2 | 56 | positive | negative | moderate | multiple | 4.0  | Yes | II  | Yes | 150 | 90  | 14.4 | death    |
| 363,377 | 1 | 65 | positive | negative | poor     | single   | 12.0 | Yes | III | Yes | 90  | 140 | 3.6  | death    |
| 363,977 | 1 | 83 | negative | negative | well     | multiple | 3.0  | no  | I   | No  | 270 | 270 | 5.0  | death    |
| 364,111 | 1 | 54 | negative | positive | moderate | multiple | 1.6  | Yes | II  | Yes | 0   | 70  | 97.9 | survival |
| 364,382 | 1 | 48 | positive | negative | moderate | single   | 3.6  | no  | I   | Yes | 0   | 80  | 97.6 | survival |
| 364,502 | 1 | 55 | negative | positive | moderate | single   | 4.0  | no  | I   | Yes | 0   | 0   | 97.6 | survival |
| 364,725 | 2 | 65 | negative | positive | poor     | multiple | 8.5  | Yes | III | Yes | 0   | 0   | 97.5 | survival |
| 365,173 | 2 | 31 | positive | negative | well     | single   | 7.5  | no  | I   | Yes | 120 | 90  | 97.4 | survival |
| 365,220 | 1 | 57 | positive | negative | moderate | single   | 10.0 | no  | I   | Yes | 0   | 90  | 97.6 | survival |
| 365,498 | 2 | 65 | negative | positive | well     | single   | 3.0  | no  | I   | Yes | 0   | 90  | 97.3 | survival |
| 366,266 | 1 | 57 | positive | negative | poor     | multiple | 5.6  | Yes | III | Yes | 90  | 30  | 97.1 | survival |
| 366,858 | 1 | 55 | negative | negative | well     | single   | 2.8  | no  | I   | No  | 0   | 180 | 97.0 | survival |
| 367,331 | 2 | 23 | positive | negative | moderate | single   | 5.0  | no  | I   | Yes | 120 | 0   | 96.9 | survival |
| 368,084 | 1 | 48 | negative | negative | poor     | single   | 16.0 | Yes | II  | No  | 270 | 0   | 19.1 | death    |
| 368,427 | 1 | 40 | positive | negative | poor     | multiple | 7.0  | Yes | III | No  | 270 | 0   | 2.8  | death    |
| 369,638 | 1 | 41 | negative | negative | well     | single   | 1.5  | no  | I   | No  | 0   | 270 | 96.3 | survival |
| 369,819 | 1 | 35 | positive | negative | well     | single   | 4.0  | Yes | II  | No  | 0   | 0   | 59.2 | death    |
| 370,433 | 1 | 56 | positive | negative | moderate | single   | 1.5  | no  | I   | No  | 0   | 120 | 9.2  | death    |
| 371,471 | 1 | 67 | negative | negative | moderate | single   | 5.4  | no  | I   | No  | 0   | 180 | 95.7 | survival |
| 371,931 | 1 | 49 | positive | negative | moderate | single   | 4.0  | Yes | II  | Yes | 0   | 140 | 79.7 | death    |
| 372,587 | 1 | 58 | positive | negative | moderate | single   | 7.0  | Yes | II  | No  | 180 | 0   | 95.3 | survival |
| 373,063 | 1 | 60 | negative | positive | well     | single   | 3.5  | no  | I   | No  | 0   | 120 | 95.2 | survival |
| 373,336 | 1 | 59 | positive | negative | poor     | single   | 3.7  | no  | I   | No  | 0   | 30  | 64.2 | death    |
| 373,499 | 2 | 62 | positive | negative | moderate | multiple | 4.0  | no  | II  | Yes | 0   | 180 | 24.6 | death    |
| 373,721 | 1 | 54 | positive | negative | poor     | multiple | 3.0  | Yes | II  | No  | 90  | 270 | 77.3 | death    |
| 374,003 | 1 | 36 | positive | negative | poor     | multiple | 2.3  | no  | II  | Yes | 240 | 270 | 31.7 | death    |
| 374,342 | 1 | 67 | negative | positive | moderate | multiple | 5.8  | no  | II  | No  | 0   | 0   | 84.2 | death    |
| 374,532 | 1 | 48 | positive | negative | poor     | single   | 9.0  | Yes | II  | No  | 140 | 180 | 21.2 | death    |
| 375,270 | 1 | 61 | positive | negative | moderate | multiple | 14.0 | Yes | III | No  | 0   | 270 | 5.8  | death    |
| 378,919 | 1 | 58 | positive | negative | poor     | multiple | 7.5  | Yes | III | Yes | 0   | 140 | 67.6 | death    |
| 379,596 | 1 | 71 | negative | positive | moderate | multiple | 10.0 | no  | II  | No  | 0   | 40  | 4.5  | death    |
| 379,748 | 1 | 59 | negative | positive | moderate | single   | 3.0  | no  | I   | Yes | 0   | 270 | 93.0 | survival |
| 379,899 | 1 | 54 | positive | negative | moderate | multiple | 2.5  | no  | I   | Yes | 120 | 0   | 93.3 | survival |
| 380,032 | 1 | 60 | negative | negative | moderate | single   | 12.0 | no  | I   | No  | 0   | 0   | 93.1 | survival |
| 380,379 | 2 | 42 | positive | negative | moderate | single   | 3.0  | no  | I   | Yes | 0   | 100 | 92.9 | survival |
| 380,445 | 1 | 43 | positive | negative | moderate | single   | 3.5  | no  | I   | Yes | 0   | 80  | 93.1 | survival |
| 380,601 | 1 | 48 | positive | negative | moderate | single   | 5.0  | Yes | II  | Yes | 140 | 180 | 52.9 | death    |

|         |   |    |          |          |          |          |      |     |     |     |     |     |      |          |
|---------|---|----|----------|----------|----------|----------|------|-----|-----|-----|-----|-----|------|----------|
| 380,667 | 1 | 73 | negative | positive | poor     | single   | 3.8  | Yes | II  | Yes | 0   | 180 | 92.9 | survival |
| 380,813 | 1 | 45 | positive | negative | moderate | single   | 4.5  | Yes | II  | Yes | 0   | 180 | 74.1 | death    |
| 382,567 | 1 | 64 | negative | negative | moderate | multiple | 3.0  | no  | II  | Yes | 0   | 270 | 19.7 | death    |
| 382,715 | 2 | 43 | positive | negative | poor     | multiple | 4.5  | Yes | II  | Yes | 30  | 90  | 33.9 | death    |
| 383,247 | 1 | 48 | positive | negative | poor     | multiple | 4.5  | Yes | II  | Yes | 60  | 90  | 19.8 | death    |
| 383,584 | 2 | 49 | positive | negative | moderate | multiple | 7.8  | Yes | III | Yes | 90  | 180 | 31.1 | death    |
| 384,365 | 1 | 56 | positive | negative | well     | single   | 2.0  | no  | I   | Yes | 0   | 60  | 16.1 | death    |
| 385,001 | 1 | 59 | positive | negative | moderate | single   | 7.0  | no  | I   | Yes | 0   | 270 | 20.4 | death    |
| 385,725 | 1 | 50 | negative | negative | poor     | single   | 22.0 | Yes | III | Yes | 60  | 120 | 12.7 | death    |
| 386,638 | 1 | 60 | negative | negative | moderate | single   | 2.5  | no  | I   | No  | 0   | 180 | 91.2 | survival |
| 386,916 | 1 | 55 | negative | positive | moderate | single   | 1.5  | Yes | II  | Yes | 0   | 0   | 91.0 | survival |
| 387,002 | 2 | 40 | positive | negative | moderate | single   | 3.7  | no  | I   | Yes | 0   | 180 | 46.9 | death    |
| 387,273 | 2 | 58 | negative | positive | moderate | single   | 5.0  | no  | I   | Yes | 0   | 180 | 71.2 | death    |
| 388,774 | 1 | 35 | positive | negative | poor     | single   | 1.0  | no  | I   | Yes | 0   | 0   | 90.5 | survival |
| 391,919 | 1 | 55 | positive | negative | moderate | multiple | 2.5  | no  | I   | Yes | 0   | 270 | 15.7 | death    |
| 393,445 | 1 | 38 | positive | negative | poor     | multiple | 5.0  | Yes | II  | No  | 180 | 0   | 12.0 | death    |
| 393,651 | 1 | 37 | positive | negative | moderate | multiple | 2.5  | no  | II  | Yes | 0   | 90  | 89.2 | survival |
| 393,848 | 2 | 55 | positive | negative | moderate | single   | 2.5  | Yes | II  | Yes | 0   | 180 | 89.1 | survival |
| 394,780 | 1 | 56 | positive | negative | poor     | single   | 4.8  | Yes | II  | No  | 0   | 140 | 27.3 | death    |
| 395,214 | 1 | 57 | negative | negative | moderate | multiple | 9.0  | Yes | III | No  | 0   | 180 | 88.5 | survival |
| 398,418 | 2 | 55 | positive | negative | poor     | single   | 8.5  | Yes | II  | Yes | 150 | 20  | 35.3 | survival |
| 399,791 | 1 | 60 | positive | negative | poor     | single   | 7.8  | Yes | II  | Yes | 270 | 180 | 12.8 | death    |
| 399,983 | 1 | 60 | negative | positive | poor     | single   | 7.5  | Yes | II  | No  | 270 | 90  | 87.4 | survival |
| 400,898 | 1 | 62 | positive | negative | well     | single   | 5.5  | no  | I   | No  | 0   | 180 | 33.0 | death    |
| 401,885 | 2 | 65 | negative | positive | poor     | single   | 3.5  | no  | I   | Yes | 60  | 150 | 17.3 | death    |
| 402,678 | 2 | 48 | negative | negative | moderate | single   | 6.5  | no  | I   | No  | 270 | 270 | 86.8 | survival |
| 405,210 | 1 | 45 | positive | negative | poor     | single   | 7.5  | Yes | II  | Yes | 0   | 60  | 20.9 | death    |
| 405,389 | 1 | 43 | negative | negative | moderate | single   | 8.5  | Yes | II  | No  | 0   | 180 | 10.5 | death    |
| 406,412 | 1 | 48 | positive | negative | poor     | single   | 2.7  | Yes | II  | Yes | 80  | 60  | 37.8 | death    |
| 408,740 | 1 | 56 | negative | negative | well     | multiple | 4.0  | no  | II  | No  | 0   | 60  | 85.4 | survival |
| 409,008 | 1 | 53 | positive | negative | moderate | single   | 4.5  | no  | I   | No  | 80  | 240 | 31.2 | death    |
| 409,179 | 1 | 62 | positive | negative | moderate | single   | 10.5 | no  | I   | Yes | 0   | 270 | 42.0 | death    |
| 409,501 | 1 | 52 | positive | negative | moderate | single   | 1.5  | no  | I   | Yes | 0   | 270 | 85.2 | survival |
| 409,699 | 1 | 69 | positive | negative | moderate | single   | 5.2  | Yes | II  | No  | 180 | 90  | 9.7  | death    |
| 409,833 | 2 | 51 | positive | negative | well     | multiple | 9.5  | no  | III | No  | 0   | 180 | 20.2 | death    |
| 411,016 | 1 | 60 | positive | negative | poor     | single   | 4.5  | no  | I   | No  | 60  | 0   | 84.7 | survival |
| 411,295 | 2 | 66 | positive | negative | poor     | multiple | 3.0  | Yes | II  | Yes | 0   | 90  | 12.2 | death    |
| 411,536 | 2 | 70 | negative | positive | moderate | single   | 2.0  | no  | I   | Yes | 0   | 140 | 84.5 | survival |
| 411,655 | 1 | 52 | positive | negative | poor     | single   | 9.5  | Yes | II  | Yes | 0   | 0   | 24.1 | death    |
| 411,702 | 1 | 60 | negative | negative | moderate | single   | 2.5  | no  | I   | No  | 0   | 90  | 84.5 | survival |
| 411,775 | 1 | 66 | positive | negative | moderate | multiple | 4.0  | no  | II  | No  | 0   | 140 | 84.4 | survival |

|         |   |    |          |          |          |          |      |     |     |     |     |     |      |                   |
|---------|---|----|----------|----------|----------|----------|------|-----|-----|-----|-----|-----|------|-------------------|
| 413,494 | 2 | 68 | negative | positive | moderate | single   | 4.5  | no  | I   | Yes | 0   | 180 | 83.8 | survival          |
| 413,564 | 1 | 57 | negative | positive | moderate | multiple | 3.5  | no  | II  | No  | 0   | 180 | 45.8 | death             |
| 415,071 | 1 | 75 | negative | positive | moderate | single   | 5.0  | no  | I   | No  | 0   | 80  | 62.4 | death             |
| 415,274 | 2 | 36 | positive | negative | poor     | single   | 9.5  | Yes | II  | No  | 0   | 180 | 8.5  | death             |
| 415,407 | 1 | 38 | positive | negative | moderate | single   | 6.5  | no  | I   | Yes | 180 | 270 | 83.1 | survival          |
| 416,198 | 1 | 59 | positive | negative | moderate | single   | 5.0  | no  | I   | Yes | 0   | 180 | 82.8 | survival          |
| 416,213 | 1 | 75 | positive | negative | moderate | single   | 6.0  | no  | I   | Yes | 210 | 270 | 82.9 | survival          |
| 416,802 | 1 | 62 | negative | positive | moderate | single   | 4.5  | no  | I   | Yes | 0   | 210 | 54.9 | lose to follow up |
| 416,806 | 1 | 55 | positive | negative | moderate | single   | 6.2  | Yes | II  | Yes | 0   | 270 | 82.8 | survival          |
| 417,065 | 1 | 56 | positive | negative | poor     | single   | 7.0  | Yes | II  | Yes | 0   | 180 | 43.5 | death             |
| 417,799 | 1 | 54 | negative | negative | poor     | single   | 12.0 | Yes | II  | Yes | 0   | 180 | 15.8 | death             |
| 418,845 | 2 | 52 | positive | negative | moderate | single   | 9.0  | Yes | II  | Yes | 40  | 0   | 37.6 | death             |
| 419,549 | 1 | 38 | positive | negative | moderate | single   | 1.0  | no  | I   | Yes | 60  | 180 | 66.0 | death             |
| 419,870 | 2 | 63 | positive | negative | poor     | single   | 6.5  | no  | I   | Yes | 0   | 90  | 11.7 | death             |
| 420,155 | 1 | 65 | negative | negative | poor     | single   | 3.5  | no  | I   | No  | 90  | 80  | 60.7 | death             |
| 422,430 | 1 | 56 | positive | negative | moderate | single   | 2.2  | no  | I   | Yes | 0   | 90  | 80.4 | survival          |
| 423,697 | 2 | 56 | negative | positive | poor     | single   | 4.5  | no  | I   | Yes | 0   | 70  | 63.3 | death             |
| 423,930 | 1 | 53 | positive | negative | moderate | single   | 3.0  | no  | I   | Yes | 0   | 160 | 79.9 | survival          |
| 424,781 | 1 | 51 | positive | negative | poor     | single   | 3.0  | Yes | II  | Yes | 100 | 20  | 79.7 | survival          |
| 426,652 | 1 | 54 | positive | negative | moderate | single   | 4.8  | Yes | II  | No  | 0   | 210 | 78.9 | survival          |
| 427,031 | 1 | 45 | positive | negative | poor     | single   | 8.0  | Yes | II  | Yes | 120 | 0   | 29.4 | death             |
| 427,148 | 1 | 63 | negative | positive | moderate | single   | 9.0  | no  | I   | No  | 0   | 120 | 78.7 | survival          |
| 427,149 | 1 | 56 | negative | negative | moderate | single   | 5.5  | Yes | II  | No  | 0   | 180 | 78.8 | survival          |
| 428,037 | 1 | 48 | positive | negative | moderate | multiple | 12.0 | Yes | III | Yes | 150 | 20  | 28.4 | death             |
| 428,265 | 1 | 36 | negative | negative | moderate | multiple | 7.5  | no  | III | No  | 15  | 40  | 38.3 | death             |
| 428,508 | 1 | 60 | negative | positive | moderate | single   | 2.0  | Yes | II  | Yes | 0   | 180 | 29.9 | death             |
| 429,160 | 1 | 68 | positive | negative | moderate | single   | 6.0  | Yes | II  | No  | 0   | 60  | 78.0 | survival          |
| 429,312 | 1 | 55 | positive | negative | moderate | single   | 4.5  | Yes | II  | Yes | 0   | 20  | 77.9 | survival          |
| 433,275 | 2 | 47 | positive | negative | poor     | single   | 3.2  | no  | I   | No  | 120 | 160 | 52.9 | death             |
| 433,293 | 1 | 54 | positive | negative | moderate | single   | 4.0  | no  | I   | Yes | 0   | 180 | 76.5 | survival          |
| 433,408 | 1 | 51 | positive | negative | well     | single   | 3.0  | no  | I   | No  | 0   | 180 | 56.7 | death             |
| 433,996 | 1 | 50 | positive | negative | poor     | single   | 2.3  | no  | I   | Yes | 0   | 50  | 61.2 | death             |
| 434,753 | 1 | 65 | positive | negative | moderate | single   | 6.7  | no  | I   | No  | 0   | 160 | 67.1 | death             |
| 435,165 | 1 | 44 | positive | negative | moderate | single   | 4.5  | no  | I   | Yes | 0   | 80  | 75.6 | survival          |
| 435,203 | 2 | 56 | positive | negative | poor     | single   | 2.7  | no  | I   | Yes | 0   | 0   | 75.6 | survival          |
| 435,271 | 1 | 70 | negative | positive | poor     | multiple | 4.0  | Yes | II  | Yes | 60  | 0   | 16.2 | death             |
| 435,712 | 1 | 43 | positive | negative | poor     | single   | 4.8  | no  | I   | No  | 60  | 0   | 75.4 | survival          |
| 435,897 | 1 | 71 | positive | negative | moderate | single   | 5.0  | Yes | II  | Yes | 0   | 60  | 11.2 | death             |
| 437,496 | 1 | 58 | positive | negative | moderate | single   | 6.7  | Yes | III | Yes | 0   | 60  | 27.7 | death             |
| 438,316 | 2 | 41 | negative | negative | well     | single   | 6.0  | no  | I   | No  | 0   | 180 | 74.7 | survival          |
| 439,550 | 2 | 64 | negative | negative | moderate | single   | 2.2  | no  | I   | Yes | 60  | 60  | 24.0 | death             |

|         |   |    |          |          |          |        |     |    |    |     |   |     |      |          |
|---------|---|----|----------|----------|----------|--------|-----|----|----|-----|---|-----|------|----------|
| 443,202 | 1 | 49 | positive | negative | moderate | single | 4.0 | no | II | Yes | 0 | 70  | 23.8 | death    |
| 443,524 | 1 | 66 | positive | negative | well     | single | 7.0 | no | I  | No  | 0 | 270 | 72.9 | survival |
